# Supplementary material for: Factors that influence the uptake of postnatal care among adolescent girls: a qualitative evidence synthesis
Source: PubMed Central journal article supplement (PMC10163540; doi:10.1136/bmjgh-2022-011560), 2023-05-03
Supplement: bmjgh-2022-011560supp001.pdf [file bmjgh-2022-011560supp001.pdf]

## Appendix 1. Data Extraction Form

| <b>POSTNATAL CARE REVIEW QES - DATA EXTRACTION</b>                                                                                         |  |
|--------------------------------------------------------------------------------------------------------------------------------------------|--|
| Reviewer                                                                                                                                   |  |
| Date                                                                                                                                       |  |
| <b>1. IDENTIFICATION</b>                                                                                                                   |  |
| ID #                                                                                                                                       |  |
| Author                                                                                                                                     |  |
| Year                                                                                                                                       |  |
| Title                                                                                                                                      |  |
| <b>2. SETTING &amp; DEMOGRAPHICS</b>                                                                                                       |  |
| Focus of the article (maternal, neonatal, both)                                                                                            |  |
| Location of study (city, district, state, country)                                                                                         |  |
| Urban or rural?                                                                                                                            |  |
| Resource setting (HIC, LMIC, LIC)                                                                                                          |  |
| Where based? (Facility, community, home, etc)                                                                                              |  |
| Language of article                                                                                                                        |  |
| # of participants (total; specify how many per FGD/how many interviewed)                                                                   |  |
| Who are the participants/respondents?                                                                                                      |  |
| Details about participant characteristics                                                                                                  |  |
| <b>3. TIMING OF STUDY</b>                                                                                                                  |  |
| Time period of focus (pregnancy, intrapartum postpartum)                                                                                   |  |
| Time period of PNC contact addressed: i) within 24 hours of the birth, ii) at least on day three after birth, ii) in the second week after |  |

|                                                                                                          |  |
|----------------------------------------------------------------------------------------------------------|--|
| birth between 7 and 14 days; iv) at six weeks after birth; v) other                                      |  |
| <b>4. LITERATURE REVIEW</b>                                                                              |  |
| Literature review undertaken/referred to (Y/N)                                                           |  |
| Focus of review appropriate and comprehensive (Y/N)                                                      |  |
| <b>5. STUDY DESIGN &amp; DATA COLLECTION</b>                                                             |  |
| a.i) Aims/objectives (list)                                                                              |  |
| a.ii) Aims/objectives appropriate? (Y/N)                                                                 |  |
| b.i) Study design (log), i.e. descriptive, grounded theory, phenomenology, etc;                          |  |
| b.ii) Study design appropriate (Y/N)                                                                     |  |
| c) Sample size appropriate y/n (clearly explained?)                                                      |  |
| d) Reflexivity present? y/n (Concerns about bias? -indicate if own concerns or author's concerns)        |  |
| e) What data collection methods were used? (i.e focus group, in-depth interview, survey, etc;)           |  |
| f) Data collection methods appropriate y/n (described and explained - including participant recruitment) |  |
| g) Other information about study design?                                                                 |  |
| <b>6. ETHICS</b>                                                                                         |  |
| Ethical issues addressed y/n (explain if necessary)                                                      |  |
| <b>7. DATA ANALYSIS</b>                                                                                  |  |

| Data analysis method appropriate y/n (clearly explained)?                                     |                                                                           |                                                     |                                                                        |                                                                             |                                                                              |                                                                                                             |                   |
|-----------------------------------------------------------------------------------------------|---------------------------------------------------------------------------|-----------------------------------------------------|------------------------------------------------------------------------|-----------------------------------------------------------------------------|------------------------------------------------------------------------------|-------------------------------------------------------------------------------------------------------------|-------------------|
| <b>8. FINDINGS</b>                                                                            |                                                                           |                                                     |                                                                        |                                                                             |                                                                              |                                                                                                             |                   |
| Do the findings reflect the data? y/n (Clear themes supported by quotes)                      |                                                                           |                                                     |                                                                        |                                                                             |                                                                              |                                                                                                             |                   |
| Are the findings relevant? y/n (generalizability, transferability, limitations all addressed) |                                                                           |                                                     |                                                                        |                                                                             |                                                                              |                                                                                                             |                   |
| QUALITY APPRAISAL SCORE (A,B,C,D*) based on 3-8 above. [*D = poor quality: Exclude]           |                                                                           |                                                     |                                                                        |                                                                             |                                                                              |                                                                                                             |                   |
| <b>9. QUALITATIVE DATA - KEY THEMES ***insert more rows as necessary</b>                      |                                                                           |                                                     |                                                                        |                                                                             |                                                                              |                                                                                                             |                   |
| Theme (author interpretation)                                                                 | Author's interpretation (i.e.: author text) <i>**include page numbers</i> | Participant quotation <i>**include page numbers</i> | What level does this theme refer to? (individual, health system, etc.) | If provider mentioned, specify: physician, nurse, midwife, CHW, other staff | Special focus population? (Migrant/Refugee, Comorbidities, Adolescent, etc.) | THEME: Resources and Access; Behaviours and attitudes; External Influences; What women want and need; Other | Reviewer comments |
|                                                                                               |                                                                           |                                                     |                                                                        |                                                                             |                                                                              |                                                                                                             |                   |
